1                   **Metagenomic analysis of milk microbiota in the bovine subclinical mastitis**

2

3                   Running title: milk microbiota in bovine subclinical mastitis

4                   Key words: metagenomics, mastitis, cow, bovine, flow cytometry

5

6 Giulia Alessandri<sup>1</sup>, Elena Sangalli<sup>2</sup>, Mario Facchi<sup>3</sup>, Federico Fontana<sup>1,4</sup>, Leonardo Mancabelli<sup>5,6</sup>,

7                   Gaetano Donofrio<sup>2\*</sup>, and Marco Ventura<sup>1,6\*</sup>

8

9     <sup>1</sup>Laboratory of Probiogenomics, Department of Chemistry, Life Sciences, and Environmental  
10 Sustainability, University of Parma, Parma, Italy; <sup>2</sup>Department of Medical-Veterinary Science,  
11 University of Parma, 43126 Parma, Italy; <sup>3</sup>DVM Bovine Practitioner, “Bergamo Veterinari” group,  
12 Bergamo, Italy; <sup>4</sup>GenProbio srl, Parma, Italy; <sup>5</sup>Department of Medicine and Surgery, University of  
13 Parma, 43125 Parma, Italy; <sup>6</sup>Microbiome Research Hub, University of Parma, Parma, Italy

14

15     \*Corresponding authors

16     Mailing address for Gaetano Donofrio, Department of Medical-Veterinary Science, University of  
17 Parma, Strada del Taglio 10, 43126 Parma, Italy. Phone: ++39-521-902677. Fax: ++39-521-  
18 032672. E-mail: [gaetano.donofrio@unipr.it](mailto:gaetano.donofrio@unipr.it)

19     Mailing address for Marco Ventura, Laboratory of Probiogenomics, Department of Chemistry,  
20 Life Sciences, and Environmental Sustainability, University of Parma, Parco Area delle Scienze  
21 11a, 43124 Parma, Italy. Phone: ++39-521-905666. Fax: ++39-521-905604. E-mail:  
22 [marco.ventura@unipr.it](mailto:marco.ventura@unipr.it)

23

24 **Abstract**

25 Subclinical mastitis is one of the most widespread diseases affecting dairy herds with detrimental  
26 effects on animal health as well as on milk productivity and quality. Despite the multi-factorial  
27 nature of this intramammary infection, the presence of pathogenic bacteria is regarded one of the  
28 main drivers of subclinical mastitis, leading to a disruption of the homeostasis of the bovine milk  
29 microbial community. However, the bovine milk microbiota alterations associated with subclinical  
30 mastitis still represents a largely unexplored research area. In this context, the species-level milk  
31 microbiota of a total of 75 milk samples, collected from both healthy and subclinical mastitis-  
32 affected cows from two different stables, was deeply profiled through an ITS, rather than a  
33 traditional, and less informative, 16S rRNA gene microbial profiling-based sequencing.  
34 Surprisingly, the obtained data of the present pilot study, not only revealed that subclinical mastitis  
35 is characterized by a reduced number of species in the bovine milk microbiota, but also that this  
36 disease does not induce standard alterations of the milk microbial community across stables. In  
37 addition, a flow cytometry-based total bacterial cell enumeration highlighted that subclinical  
38 mastitis is accompanied by a significant increment in the number of milk microbial cells.  
39 Furthermore, the combination of the metagenomic approach and total bacterial cell enumeration  
40 allowed to identify different potential microbial marker strictly correlated with subclinical mastitis  
41 across stables.

## 42 **Introduction**

43 Bovine mastitis is a worldwide recognized disease affecting dairy cows with devastating impacts  
44 on productivity, milk quality, and animal well-being (1-3). Clinically defined as an inflammation  
45 of the mammary gland, bovine mastitis is caused by multi-etiological agents, including several  
46 microbial and environmental predisposing factors (3-5). Based on the severity of the symptoms,  
47 this disease is classified into clinical or subclinical mastitis (SM), both accompanied by high milk  
48 somatic cell count (4, 5). However, if the former is distinguished by evident physiological  
49 alterations, including swelling and inflammation of the mammary gland as well as changes in milk  
50 color, consistency, and yield, the latter is characterized by a shortage of visible clinical symptoms,  
51 yet a damage in lactation performance, immune function, and alteration of the normal metabolic  
52 activities (3, 5-7). Consequently, due to the long latency period and the lack of obvious clinical  
53 signs that prevent prompt interventions to limit its spread, SM incidence is significantly higher  
54 than that of clinical mastitis, accounting for approximately 90% of bovine mastitis cases (7).  
55 Furthermore, despite its multi-factorial nature, SM generally occurs as a result of intramammary  
56 infection induced by specific pathogenic bacteria that not only trigger inflammation, leading to  
57 detrimental effects for both mammary tissue and bovine physiology, but also disrupt the  
58 homeostasis of the bovine milk microbial community with a consequent overgrowth of these  
59 pathogenic microorganisms and potential risk of their transmission to healthy cows (5, 8-10).  
60 However, despite the relevant role played by bacteria in SM etiology, the milk microbial  
61 composition associated to this clinical status is still far from being completely dissected. Indeed,  
62 most of publicly available metagenomic studies only employed 16S rRNA gene microbial  
63 profiling-based sequencing, thus preventing an accurate and complete characterization of the  
64 bovine milk microbiota associated to SM down to the species level (3, 6, 7, 11, 12). At the same

65 time, studies limited to culture-dependent investigations, despite being able to identify the  
66 presence of underrepresented pathogenic microorganisms in subclinical bovine milk whose  
67 detection can escape metagenomics due to the intrinsic limit of this molecular approach (13), do  
68 not allow to obtain an accurate overview of how the milk microbiota can change during SM (14-  
69 16).

70 In this context, to evaluate possible species-level alterations of bovine milk microbial composition  
71 due to SM, a total of 72 milk samples, subdivided into 38 and 34 milk samples from healthy and  
72 SM-affected cows, respectively, were collected from two different stables. Subsequently, samples  
73 were simultaneously subjected to an Internally Transcribed Spacer (ITS) microbial profiling  
74 sequencing and to a flow cytometry-based total bacterial cell enumeration. The analysis of the  
75 microbial profiles revealed that environmental factors play a crucial role in modulating the  
76 taxonomic composition of milk microbiota and, therefore, to avoid biases related to environmental  
77 factors, samples were analyzed separately based on their stable of origin. In this context, the  
78 comparison of milk microbial community between healthy and diseased cows from the two stables  
79 highlighted that SM does not induce unique alterations in the bovine milk microbiota, but rather,  
80 the microbial modulation seems to be stable-dependent. In support of this finding, diverse bacterial  
81 species have been identified to be associated to SM, and therefore as microbial marker closely  
82 associated with subclinical mastitis, including *Corynebacterium bovis*, *Corynebacterium xerosis*,  
83 and *Streptococcus uberis*, between the two considered stables. Furthermore, total bacterial cell  
84 enumeration highlighted that SM is strictly associated with a significant increment of the total  
85 microbial cells present in the milk samples.

## 86 **Experimental Procedures**

87 **Ethical statement.** All the dairy cows involved in this study were reared in commercial private  
88 farms and were not subjected to any invasive procedures. Milk samples used for the analyses were  
89 collected during the daily milking procedure in according to the International Committee for  
90 Animal Recording procedures (ICAR <https://www.icar.org/index.php/icar-recording-guidelines/>).

91 **Sample collection and clinical health status screening.** Raw milk samples were collected from  
92 a total of 72 dairy cows, divided into 38 healthy cows and 34 cows affected by SM, from two  
93 different farms located in the North of Italy (Table S1). Per each cow, two milk samples were  
94 sterilely collected by hand from all milking quarters during the morning milking. One of the two  
95 milk samples of each milking quarter was collected in bronopol tubes for Somatic Cell Count  
96 (SCC) analysis. Before collection, the teat-ends were cleaned and properly disinfected with 70%  
97 ethanol, while the first milk jets were discarded. Furthermore, only milk samples from dairy herds  
98 that had not undergone any antibiotic treatment during the two months prior sample collection  
99 were included in this study. Once collected, milk samples were refrigerated and immediately  
100 shipped to the laboratory where 50 ml were preserved at -20°C for DNA extraction and flow  
101 cytometry-based cell enumeration, while the other 50 ml in bronopol tubes were stored at 4°C for  
102 SCC analysis. The latter was performed by using the XX. the cut-off value set for the determination  
103 of SM was  $SCC > 200,000$  cells/ml, as previously described (16, 17).

104 **DNA extraction and microbial ITS profiling.** Raw milk samples were subjected to DNA  
105 extraction using the DNeasy PowerFood Microbial Kit (Qiagen, Germany), following the  
106 manufacturer's instructions. Subsequently, the Internal Transcribed Spacer (ITS) sequences were  
107 amplified from extracted DNA using the primer pair UNI\_ITS\_fw (5'-  
108 KRGGRYKAAGTCGTAACAAG-3') and UNI\_ITS\_rv (5'-TTTTCRYCTTTCCTCACGG-3'),

109 targeting the entire spacer region between the 16S rRNA and 23 rRNA genes within the rRNA  
110 locus, as previously described (18). Illumina adapter overhang nucleotide sequences were added  
111 to the ITS amplicons, which were further processed using the 16S Metagenomic Sequencing  
112 Library Preparation Protocol (Part No. 15044223 Rev. B – Illumina). Amplifications were carried  
113 out using a Verity Thermocycler (Applied Biosystem, USA). The integrity of the PCR amplicons  
114 was analyzed by gel electrophoresis. DNA products obtained following PCR-mediated  
115 amplification of the ITS region sequences were purified by a magnetic purification step employing  
116 the Agencourt AMPure XP DNA purification beads (Beckman Coulter Genomics GmbH, Brea,  
117 USA), to remove primer dimers. DNA concentration of the amplified sequence library was  
118 determined by a fluorometric Qubit quantification system (Life Technologies, USA). Amplicons  
119 were diluted to a final concentration of 4 nM, and 5 µl of each diluted DNA amplicon sample were  
120 mixed to prepare the pooled final library. Sequencing was performed using an Illumina MiSeq  
121 sequencer with MiSeq reagent kit v3 chemicals, using 300 cycles.

122 **ITS microbial profiling analysis.** After sequencing, the obtained .fastq files were processed using  
123 the METAnnotatorX2 pipeline (19). Specifically, paired-end reads were merged, and quality  
124 control retained only sequences with a minimum length of 100 bp and a mean sequence quality  
125 score of >20. Sequences with mismatched forward and/or reverse primers were omitted.  
126 Furthermore, sequences were filtered to remove *Bos taurus* DNA.

127 **Evaluation of bacterial cell density by flow cytometry.** For total bacterial cell count, each milk  
128 sample was 10,000 diluted in physiological solution (Phosphate Buffered Saline, PBS, pH 6.5).  
129 Subsequently, 1 ml of the obtained bacterial cell suspension was stained with 1 µl of SYBR Green  
130 I (Invitrogen, Waltham, USA) (1:100 diluted in dimethyl sulfoxide), vortex-mixed, and incubated  
131 in the dark for at least 15 min before measurement. All count experiments were performed using

132 an Attune NxT flow cytometry (ThermoFisher Scientific, Waltham, USA) equipped with a blue  
133 laser set at 50 mV and tuned at an excitation wavelength of 488 nm. Multiparametric analyses  
134 were performed on both scattering signals, i.e., side scatter and forward scatter, while SYBR Green  
135 I fluorescence was detected on the BL1 530/30 nm optical detector. Cell debris was excluded from  
136 acquisition analysis by setting a BL1 threshold. In addition, to exclude remaining background  
137 events and obtain an accurate microbial cell count, the gated fluorescence events were evaluated  
138 on the forward-sideways density plot, as previously described (20). All data were statistically  
139 analyzed with the Attune NxT flow cytometry software.

140 **Statistical analyses.** Eigenvalue scores were retrieved from a Bray-Curtis dissimilarity matrix  
141 based on the taxonomical profiles of samples. Two-dimensional PCoA representation of  
142 eigenvalue scores were carried out using OriginLabPro 2021b. Ellipses in the PCoA were drawn  
143 based on standard deviation of each group. The confidence limit for ellipses was set to 0.95.  
144 PERMANOVA statistical analyses were performed using Rstudio software. Furthermore, SPSS  
145 software was used to compute the independent Student's T-test statistical analyses.

146 **Data availability statement.** ITS microbial profiling data were deposited in the NCBI-related  
147 SRA database with the accession number PRJNA942519.

## 148 **Results and Discussion**

149 **Characterization of the microbial community of milk samples from healthy and subclinical**  
150 **mastitis-affected cows.** To highlight possible species-level taxonomical differences in the bovine  
151 milk microbial community between healthy cows and cows affected by SM, a total of 72 milk  
152 samples were collected, divided into 38 milk samples from healthy cattle and 34 milk samples  
153 from cows with subclinical mastitis (Table S1). Subsequently, the microbial DNA extracted from  
154 each milk sample was subjected to an ITS microbial profiling, as previously described (18).  
155 Illumina sequencing generated a total of 4,342,880 reads with an average of 60,317 reads per  
156 sample, reduced to a total of 2,085,812 reads with an average of 28,969 reads per sample after  
157 filtering for quality and *Bos taurus* DNA (Table S2).

158 The species richness analysis revealed that the number of bacterial species present in healthy cow  
159 milk is significantly higher than that of the milk collected from cows with SM, with an average  
160 number of species of 54 and 35, respectively (Student's T-test  $p$ -value  $< 0.01$ ) (Figure S1). Thus,  
161 suggesting that subclinical mastitis is characterized by a significant reduction of milk microbial  
162 biodiversity, a condition that is frequently encountered in microbial communities associated with  
163 various diseases (32864871, 35038617). However, a Bray-Curtis dissimilarity-based beta-  
164 diversity analysis, represented through a Principal Coordinate Analysis (PCoA), revealed that  
165 environmental factors ( $R^2 = 0.181$  and PERMANOVA  $p$ -value = 0.001), i.e., the different stable  
166 from which samples were collected, seemed to have a higher impact on the modulation of milk  
167 microbial biodiversity than cow clinical status ( $R^2 = 0.038$  and PERMANOVA  $p$ -value = 0.003),  
168 with a clear separation of samples according to their stable of origin (Figure S1). Thus, indicating  
169 that different diets, environments, and litters could play a crucial role in the modulation of the  
170 bovine milk microbiota regardless of the cow clinical status. Furthermore, the PCoA showed that



171 two samples from stable 1 displayed a microbial taxonomic profile that strongly differed from that  
172 of the other samples from the same stable (Figure S1). Therefore, they were considered as outliers  
173 and eliminated from subsequent analysis.

174 **Stable-related differences in the taxonomic composition of milk samples between healthy and**

175 **subclinical mastitis-affected cows.** Based on the above findings according to which the exposure

176 to different diet, litters, and breeding management, strongly influenced the milk microbial

177 communities, to avoid biases related to environmental factors, the collected samples were

178 separately analyzed according to their stable of origin to evaluate possible differences in the

179 taxonomic composition of milk samples from healthy and SM-affected cows. A separation that

180 was possible because, despite the small number of sampled stables, the number of milk samples is

181 balanced between healthy and subclinical mastitis-affected cows within each stable (Table S1). In

182 this context, the species richness analysis highlighted that only for one of the two stables, i.e.,

183 stable 2, the number of bacterial species was significantly higher in the milk samples from healthy

184 cows when compared to that from cows with SM (Student's t-test  $p$ -value < 0.001), counting an

185 average number of microbial species of 55 and 29, respectively (Figure 1 and Table S3). However,

186 even if not statistically significant (Student's T-test  $p$ -value = 0.482), a slight increase in the

187 average number of microbial species was observed in healthy cow milk samples from stable 1

188 respect to the SM-affected cows, passing from an average of 54 to 50 bacterial species, respectively

189 (Figure 1 and Table S3). Thus, strengthening the abovementioned notion that, even if not always

190 statistically significant, SM is characterized by a general reduction of milk microbial biodiversity.

191 In addition, in-depth insights into the microbial biodiversity of milk samples divided per stable

192 and represented through a PCoA highlighted that the SM played a significant role ( $R^2 = 0.0894$

193 and PERMANOVA  $p$ -value < 0.001) in the modulation of the taxonomic composition of milk

194 samples from stable 2 with a clear separation of samples according to their clinical status, while  
195 the microbial communities of milk samples from stable 1 did not differ in biodiversity between  
196 healthy and SM cows ( $R^2 = 0.024$  and PERMANOVA  $p$ -value = 0.798) (Figure 1). Thus,  
197 suggesting that subclinical mastitis does not always induce a drastic modulation in the taxonomic  
198 composition of the milk microbial communities. Conversely, this finding indicates that, depending  
199 on the environmental factors, SM is characterized by a different alteration of the bovine milk-  
200 related microbial community biodiversity and species richness.

201 **Subclinical mastitis effects on species-level core milk microbial communities.** Reconstruction  
202 of the “core” milk microbiota, i.e., the bacterial taxa that are shared across samples of a defined  
203 cohort, allows the identification of the most prevalent bacterial species that inhabits the bovine  
204 milk (21, 22). In this context, to evaluate the impact that subclinical mastitis may have on the most  
205 prevalent milk bacterial species, the “core” microbial community characterizing milk samples  
206 from healthy cows was compared to that of milk from SM-affected bovines. Specifically, only  
207 those bacterial taxa with a prevalence > 80% were considered as part of the “core” milk  
208 community, as previously described (23). Based on this cut-off, 23 bacterial species resulted to be  
209 shared between the “core” microbiota of healthy and SM cows from stable 1, with *Aerococcus*  
210 *urinaeequi*, *Jeotgalibaca porci*, *Paraclostridium bifermentans*, *Romboutsia ilealis*, *Turicibacter*  
211 *sanguinis*, *Weissella jogaejeotgali* as well as two not yet identified species belonging to the genera  
212 *Romboutsia* and *Turicibacter* as the most abundant “core” taxa (average relative abundance >3%)  
213 (Table S4). Thus, suggesting that these microbial species are typical colonizers of the bovine milk  
214 regardless of the clinical status for stable 1. Conversely, three bacterial species, including  
215 *Bifidobacterium pseudolognum*, and two not yet characterized species belonging to the genera  
216 *Olsenella*, and *Staphylococcus* were exclusively part of the “core” microbiota of milk from healthy

217 cows, while six microbial taxa only belonged to the “core” microbial community of subclinical  
218 mastitis milk samples, encompassing *Lactobacillus acidipiscis*, *Staphylococcus hominis*, and four  
219 unknown species of the genus *Anaerococcus*, *Jeotgalicoccus*, *Mogibacterium*, and  
220 *Tetragenococcus* (Table S4). Interestingly, *B. pseudolongum* has been identified as one of the main  
221 bifidobacterial players of the mammalian milk in healthy subjects (24-26), thus indicating that this  
222 bacterial species may be considered as marker of a healthy status that may undergo a reduction in  
223 prevalence in case of subclinical mastitis.

224 Differently from stable 1, in stable 2 only two bacterial species were shared between the “core”  
225 milk microbiota of healthy and SM-affected cows, i.e., two yet unclassified species belonging to  
226 the genera *Corynebacterium* and *Staphylococcus* (Table S4). Interestingly, the latter corresponded  
227 to the only two taxa present with a prevalence > 80% in the SM milk samples. In contrast, the  
228 “core” microbial community of milk collected from healthy cows consisted of 11 additional  
229 bacterial taxa including *Staphylococcus chromogenes*, *Clostridioides difficile*, and *R. ilealis*  
230 together with 8 not yet identified species belonging to genera *Clostridioides*, *Enterococcus*,  
231 *Kurthia*, *Lysinibacillus*, *Macrococcus*, *Paeniclostridium*, *Romboutsia*, *Staphylococcus*, and  
232 *Turicibacter* (Table S4). Thus, suggesting that, for stable 2, the inflammation of the mammary  
233 gland induced a more pronounced modulation of the “core” milk microbial community, when  
234 compared to that observed for stable 1, recording a drastic reduction in the number of bacterial  
235 species shared among the milk samples collected from cows with SM.

236 Overall, these results highlighted that SM does not induce standard modulation of the “core” milk  
237 bacterial composition, but rather, these microbial changes seem to depend on environmental  
238 factors. An observation that underlines the importance of characterizing the milk microbiota of  
239 healthy cows within each stable to create a “reference standard” to be compared with the microbial

240 community of milk samples from subclinical mastitis-affected cows from the same stable to  
241 identify those microbial species potentially involved in the onset of SM for each stable. At the  
242 same time, the presence of yet unclassified species in the “core” microbiota of milk from both  
243 healthy and diseased cows highlighted the urgent need to apply culture-dependent approaches  
244 aimed at isolating and characterizing this milk microbial dark matter.

245 **Prediction of putative milk microbial markers correlated with subclinical mastitis.** To

246 identify possible microbial biomarkers strictly associated with SM, milk samples collected from  
247 healthy cows were compared with those from SM-affected cows. Interestingly, for stable 1, only  
248 one bacterial species, i.e., a not yet characterized species of the genus *Lactococcus*, was  
249 significantly more abundant in healthy cows when compared to the diseased ones (Student’s T-  
250 test p-value = 0.042), thus indicating that this taxon may be considered as a positive microbial  
251 biomarker associated with a healthy condition. However, the latter microbial species showed a  
252 reduced relative abundance (0.05%) as well as a low prevalence (26.67%) (Figure 2 and Table S4),  
253 thus suggesting that SM does not induce striking changes in the milk microbiota of stable 1,  
254 preventing the identification of SM-related microbial biomarkers. However, in depth insight into  
255 taxonomic profiles of milk samples from stable 1 highlighted that *Streptococcus dysgalactiae*, one  
256 of the most prevalent pathogens causing bovine mastitis worldwide, was detected only in milk  
257 samples from SM-affected cows, and when present, this species displayed a high average relative  
258 abundance (3.96%) (10, 27-29) (Table S4 and Table S5). At the same time, *Corynebacterium*  
259 *bovis*, another bacterial species listed among the pathogenic microorganisms closely associated  
260 with SM, possessed a higher average relative abundance and prevalence in milk samples from  
261 cows with SM with respect to the ones collected from healthy cows (Table S4) (30-32). In this

262 context, even if not statistically significant, these results strengthen the notion that both *S.*  
263 *dysgalactiae* and *C. bovis* may be considered as microbial biomarkers of SM.

264 Differently from stable 1, the comparison of taxonomic profiles between healthy and diseased  
265 cows from stable 2 highlighted that the average relative abundance of 33 bacterial species  
266 significantly differed based on the clinical status (Figure 2 and Table S5). Among the latter, *B.*  
267 *pseudolongum* was only found in milk samples from healthy cows (Student's T-test  $p$ -value =  
268 0.025) (Figure 2 and Table S5). In this context, as above reported, since *B. pseudolongum* has been  
269 identified as a commensal microorganisms of bovine milk and members of the genus  
270 *Bifidobacterium* are known to play multiple beneficial effects upon their host promoting anti-  
271 inflammatory response, providing protection against pathogen colonization, and favoring the  
272 proliferation of beneficial butyrogenic microbial players that can use the acetate produced by the  
273 bifidobacterial fermentation of complex glycans, this species can be considered as microbial  
274 biomarker of a healthy status (7, 30, 33-35). Furthermore, *Dietzia aerolata*, as well as three yet  
275 unclassified species of the genera *Dietzia*, *Facklamia*, and *Janibacter* were not only more prevalent  
276 but also significantly more abundant in milk samples from healthy cows when compared to that of  
277 subjects with SM (Figure 3, Table S4 and Table S5). Notably, these genera were considered as  
278 commensal microorganisms of the milk microbiota (36-38) suggesting their possible involvement  
279 as positive microbial markers of a healthy conditions. However, the fact that these microbial  
280 species corresponded to taxa not yet isolated strengthen the notion that a culture-based research  
281 effort is required for the isolation and characterization of potential microbial markers of a healthy  
282 or SM status. Conversely, *Streptococcus uberis* was identified as the only bacterial species, among  
283 those taxa that significantly differed between the two cow groups, with a significantly higher  
284 relative abundance in the milk samples of cows with SM when compared to the those from healthy

285 cows (Student's T-test  $p$ -value = 0.013) (Figure 3, Table S4 and Table S5). *S. uberis* has been  
286 widely described as a common pathogen strictly related with both clinical and subclinical mastitis  
287 thanks to its ability to persist under environmental stress or exposure to antibiotic treatment  
288 inducing biofilm formation when in contact with  $\alpha$ - and  $\beta$ -casein milk component (39-42). Thus,  
289 indicating *S. uberis* as the potential responsible microorganism of the bovine intramammary  
290 infection in stable 2 and electing this taxon as biomarker of subclinical mastitis.

291 Overall, these results not only reinforce the above-mentioned evidence that SM induces different  
292 variations in the microbial composition of bovine milk depending on the environment, but also  
293 underline that the microbial etiological agents of SM differ across stables. Thus, suggesting that  
294 the characterization and identification of the microbial agents causing SM is essential to activate  
295 targeted strategies to limit the diffusion of the intramammary gland infection.

296 **Bacterial cell count-dependent taxonomical differences in the milk microbiota of healthy and**  
297 **subclinical mastitis-affected cows.** To evaluate whether SM may have an impact on the overall  
298 number of the bacterial cells present in bovine milk, each collected milk sample was subjected to  
299 a flow cytometry-based total bacterial cell enumeration. Interestingly, for both stables, the average  
300 of the microbial cell number present in the milk samples collected from cows with SM was  
301 significantly higher when compared to that observed for samples from healthy cows (Student's T-  
302 test  $p$ -value of 0.002 and 0.001 for stable 1 and 2, respectively) (Figure 3 and Table S6). Indeed,  
303 the average of the flow cytometry readouts related to milk samples from cows with SM exceeded  
304 by at least 3 times the observed average number of bacterial cells in milk samples from healthy  
305 cows for both stables, with an average of 1.84E+06 and 1.26E+06 cells/ml for milk from healthy  
306 cows and 6.33E+06 and 8.34E+06 cells/ml for milk from SM-affected cows for stable 1 and 2,  
307 respectively (Figure 3 and Table S6). An observation that leads to suggest that this inflammatory

308 disease affecting the bovine mammary glands is not only characterized by an alteration of the milk  
309 microbial community, but also by a significant increase in the number of microbial cells present  
310 in the milk. Furthermore, differently from milk taxonomic composition that undergoes different  
311 alterations among stables, an increase in the number of bacterial cells in SM cow-derived milk  
312 samples seemed to be a common feature of the two different stables regardless of environmental  
313 factors.

314 Based on these observations, to obtain a comprehensive biological interpretation of the analyzed  
315 milk microbial community complexity and to identify further differences in the taxonomic  
316 composition of milk samples between healthy and SM-affected cows based on the number of  
317 bacterial cells, the assessed cell counts were subsequently employed to normalize ITS microbial  
318 profiling sequencing data transforming relative metagenomic data into absolute abundances, as  
319 previously described (20). Insights into the latter revealed that the number of cells of 12 bacterial  
320 species significantly differed between milk samples from healthy and SM-affected cows in stable  
321 1 (Figure 3). Interestingly, *C. bovis*, whose relative abundance was not significant between the two  
322 groups as above reported, displayed a significantly higher absolute abundance in milk samples  
323 from cows with mammary gland inflammation (average absolute abundance of  $4.99\text{E}+04$  cells/ml)  
324 when compared to the healthy ones (average absolute abundance of  $3.14\text{E}+03$  cells/ml) (Student's  
325 T-test p-value = 0.038) (Figure 3 and Table S6). Furthermore, *Corynebacterium xerosis*, another  
326 bacterial species frequently associated with bovine subclinical mastitis (43-45), showed a  
327 significant average absolute abundance increment of almost 10 times, moving from  $2.94\text{E}+03$  to  
328  $2.91\text{E}+04$  cells/ml in milk samples from cows with intramammary infection when compared to the  
329 healthy ones (Student's T-test p-value = 0.033) (Figure 3 and Table S6). In this context, the  
330 evaluation of the absolute abundances allowed to identify two species of the genus

331 *Corynebacterium*, i.e., *C. bovis* and *C. xerosis*, as the potential etiological agents of SM for stable  
332 1. Moreover, since the two bacterial species are not exclusively present in the microbial  
333 community of milk from cows with inflammation of the mammary gland, it is possible to assume  
334 that a certain cell number of these two species is necessary to induce the inflammatory condition  
335 typical of SM.

336 Conversely, the assessment of the absolute abundance-based taxonomic profiles for stable 2  
337 revealed that only a single species significantly differed between milk samples of healthy and  
338 diseased cows, i.e., *S. uberis* (Student's T-test  $p$ -value = 0.033) (Figure 3 and Table S6).  
339 Specifically, this microbial species displayed an increment of the cell number of almost 5-fold in  
340 the milk samples from cows with SM when compared to that of the healthy cows (Figure 3 and  
341 Table S6). Thus, confirming the role of this species in the onset of subclinical mastitis in stable 2.

342 Overall, these results highlighted how the comparison of absolute abundances, obtained through  
343 the combination of a sequencing approach with a flow cytometry-based total cell count, may  
344 provide more accurate information about the alteration that the milk microbial composition may  
345 undergo in case of SM.



## 346 **Conclusions**

347 Bovine intramammary inflammation represents a worldwide burden causing serious repercussions  
348 not only on the health of dairy herds, but also on milk productivity and quality (15, 46). To limit  
349 the spread of this disease, and especially of its silent form, i.e., subclinical mastitis, whose  
350 containment is difficult due to the lack of evident symptoms and its high incidence rate, the  
351 identification of SM microbial causative agents is of crucial significance (12, 47-49). However,  
352 the impact of bovine milk microbial composition that may have on SM has not yet been fully  
353 investigated. In this context, the application of an ITS microbial profiling to milk samples collected  
354 from healthy and SM-affected cows from two different stables highlighted that environmental  
355 factors play a predominant role in the modulation of the milk microbial community regardless of  
356 the clinical status, thus suggesting the need to separately analyze samples according to their stable  
357 of origin to avoid environmental factor-related biases. The subsequent comparison of milk samples  
358 divided per stable showed that, in general, SM is associated to a reduced number of species in the  
359 milk microbial community. On the contrary, the analyses of the impact that SM may have on the  
360 “core” milk microbiota between healthy and diseased bovines showed that this silent  
361 intramammary inflammation induces stable-related alteration of the “core” milk bacterial  
362 composition. Thus, emphasizing that, despite being characterized by a lack of obvious symptoms,  
363 subclinical mastitis is accompanied by an alteration of the bovine milk microbiota. Furthermore,  
364 the enumeration of the bacterial cells presents in each collected milk sample through flow  
365 cytometry evidenced that, in general, SM is associated with a significant increase of milk bacterial  
366 cells. Furthermore, the normalization of the metagenomic taxonomic profiles with the obtained  
367 total cell counts allowed to obtain absolute abundance-based compositional profiles that not only  
368 identified *Corynebacterium bovis* together with *Corynebacterium xerosis* and *Streptococcus*

369 *uberis* as potential microbial markers of SM for stable 1 and 2, respectively, but also lead to suggest  
370 that the intramammary inflammation typical of SM may not only be associated with the presence  
371 of a certain bacterial taxon, but also with the total number of cells of that species in the bovine  
372 milk. Thus, suggesting the importance of the combination of a sequencing approach with a  
373 bacterial cell enumeration to obtain a more accurate overview of the milk microbial composition  
374 associated with subclinical mastitis.

375 **Declarations**

376 **Conflict of interest disclosure**

377 The authors declare no competing interest.

378 **Acknowledgements**

379 We thank GenProbio srl for financial support of the Laboratory of Probiogenomics. Part of this  
380 research has been conducted using the High-Performance Computing (HPC) facility of the  
381 University of Parma.

382 **Figure legend**

383 **Figure 1:** Species-level milk microbial biodiversity between healthy and SM-affected cows. Panel  
384 a shows the box and whisker plot of the calculated species-richness based on the number of  
385 microbial species observed between the two clinical status groups divided per stable. For each box  
386 and whisker plot, the x-axis reports the two considered clinical status-based groups, while the y-  
387 axis depicts the number of bacterial species. Boxes are determined by the 25<sup>th</sup> and 75<sup>th</sup> percentiles.  
388 The whiskers are determined by the maximum and minimum values that correspond to the box  
389 extreme values. Lines inside the boxers represent the average of the species number, while crosses  
390 correspond to the median. Panel b displays the two bidimensional Bray-Curtis dissimilarity index-  
391 based PCoA of each milk sample divided per stable.

392

393 **Figure 2:** Species-level differences in the taxonomic composition of milk samples from healthy  
394 and SM-affected cows. Panels a and b report the average relative abundances of those bacterial  
395 species that significantly differ in the milk samples from healthy and diseases cows for stable 1  
396 and 2, respectively.

397

398 **Figure 3:** Evaluation of milk total bacterial counts between healthy and SM-affected cows. Panel  
399 a reports the bar plot showing the taxonomic profiles of each milk sample normalized for the flow  
400 cytometry-based bacterial cell enumeration. Panel b and c display the microbial species whose  
401 absolute abundance differed between healthy and SM-affected cows in stable 1 and 2, respectively.

402

403 **Supplementary figure legend**

404 **Figure S1:** Differences in milk microbial biodiversity between healthy and SM-affected dairy  
405 cows. Panel a shows the box and whisker plot of the calculated species-richness based on the  
406 number of microbial species observed between the two clinical status groups. For each box and  
407 whisker plot, the x-axis reports the two considered clinical status-based groups, while the y-axis  
408 depicts the number of bacterial species. Boxes are determined by the 25<sup>th</sup> and 75<sup>th</sup> percentiles. The  
409 whiskers are determined by the maximum and minimum values that correspond to the box extreme  
410 values. Lines inside the boxers represent the average of the species number, while crosses  
411 correspond to the median. Panel b displays the two bidimensional Bray-Curtis dissimilarity index-  
412 based PCoA of each collected milk sample. The ellipses of the PCoA were drawn based on the  
413 standard deviation of each considered group.

## 414 References

- 415 1. Ruegg PL. 2022. The bovine milk microbiome - an evolving science. *Domest Anim*  
416 *Endocrinol* 79:106708.
- 417 2. Sharun K, Dhama K, Tiwari R, Gugjoo MB, Iqbal Yattoo M, Patel SK, Pathak M, Karthik  
418 K, Khurana SK, Singh R, Puvvala B, Amarpal, Singh R, Singh KP, Chaicumpa W. 2021.  
419 Advances in therapeutic and management approaches of bovine mastitis: a  
420 comprehensive review. *Vet Q* 41:107-136.
- 421 3. Wang Y, Nan X, Zhao Y, Jiang L, Wang H, Zhang F, Hua D, Liu J, Yao J, Yang L, Xiong  
422 B. 2022. Consumption of Supplementary Inulin Modulates Milk Microbiota and  
423 Metabolites in Dairy Cows with Subclinical Mastitis. *Appl Environ Microbiol*  
424 88:e0205921.
- 425 4. Abebe R, Hatiya H, Abera M, Megersa B, Asmare K. 2016. Bovine mastitis: prevalence,  
426 risk factors and isolation of *Staphylococcus aureus* in dairy herds at Hawassa milk shed,  
427 South Ethiopia. *BMC Vet Res* 12:270.
- 428 5. Abed AH, Menshawy AMS, Zeinhom MMA, Hossain D, Khalifa E, Wareth G, Awad MF.  
429 2021. Subclinical Mastitis in Selected Bovine Dairy Herds in North Upper Egypt:  
430 Assessment of Prevalence, Causative Bacterial Pathogens, Antimicrobial Resistance and  
431 Virulence-Associated Genes. *Microorganisms* 9.
- 432 6. Kaczorowski L, Powierska-Czarny J, Wolko L, Piotrowska-Cyplik A, Cyplik P, Czarny J.  
433 2022. The Influence of Bacteria Causing Subclinical Mastitis on the Structure of the Cow's  
434 Milk Microbiome. *Molecules* 27.
- 435 7. Wang Y, Nan X, Zhao Y, Jiang L, Wang H, Zhang F, Hua D, Liu J, Yao J, Yang L, Luo  
436 Q, Xiong B. 2021. Dietary Supplementation of Inulin Ameliorates Subclinical Mastitis via  
437 Regulation of Ruminal Microbial Community and Metabolites in Dairy Cows. *Microbiol*  
438 *Spectr* 9:e0010521.
- 439 8. Zhang H, Wang Z, Yao H, Jiang L, Tong J. 2022. Intramammary infusion of matrine-  
440 chitosan hydrogels for treating subclinical bovine mastitis -effects on milk microbiome and  
441 metabolites. *Front Microbiol* 13:950231.
- 442 9. El-Sayed A, Kamel M. 2021. Bovine mastitis prevention and control in the post-antibiotic  
443 era. *Trop Anim Health Prod* 53:236.
- 444 10. Addis MF, Tanca A, Uzzau S, Oikonomou G, Bicalho RC, Moroni P. 2016. The bovine  
445 milk microbiota: insights and perspectives from -omics studies. *Mol Biosyst* 12:2359-72.
- 446 11. Wang Y, Nan X, Zhao Y, Jiang L, Wang H, Zhang F, Hua D, Liu J, Yang L, Yao J, Xiong  
447 B. 2022. Changes in the Profile of Fecal Microbiota and Metabolites as Well as Serum  
448 Metabolites and Proteome After Dietary Inulin Supplementation in Dairy Cows With  
449 Subclinical Mastitis. *Front Microbiol* 13:809139.
- 450 12. Steinberg RS, Silva ESLC, de Souza MR, Reis RB, da Silva PCL, Lacorte GA, Nicoli JR,  
451 Neumann E, Nunes AC. 2022. Changes in bovine milk bacterial microbiome from healthy  
452 and subclinical mastitis affected animals of the Girolando, Gyr, Guzera, and Holstein  
453 breeds. *Int Microbiol* 25:803-815.
- 454 13. Alessandri G, Argenti C, Milani C, Turrone F, Cristina Ossiprandi M, van Sinderen D,  
455 Ventura M. 2020. Catching a glimpse of the bacterial gut community of companion  
456 animals: a canine and feline perspective. *Microb Biotechnol* 13:1708-1732.
- 457 14. Polveiro RC, Vidigal PMP, de Oliveira Mendes TA, Yamatogi RS, da Silva LS, Fujikura  
458 JM, Da Costa MM, Moreira MAS. 2022. Distinguishing the milk microbiota of healthy

- 459 goats and goats diagnosed with subclinical mastitis, clinical mastitis, and gangrenous  
460 mastitis. *Front Microbiol* 13:918706.
- 461 15. Khasapane NG, Nkhebenyane JS, Kwenda S, Khumalo ZTH, Mtshali PS, Taioe MO,  
462 Thekiso OMM. 2021. Application of culture, PCR, and PacBio sequencing for  
463 determination of microbial composition of milk from subclinical mastitis dairy cows of  
464 smallholder farms. *Open Life Sci* 16:800-808.
- 465 16. Pang M, Xie X, Bao H, Sun L, He T, Zhao H, Zhou Y, Zhang L, Zhang H, Wei R, Xie K,  
466 Wang R. 2018. Insights Into the Bovine Milk Microbiota in Dairy Farms With Different  
467 Incidence Rates of Subclinical Mastitis. *Front Microbiol* 9:2379.
- 468 17. Zhang J, Li W, Tang Y, Liu X, Zhang H, Zhou Y, Wang Y, Xiao W, Yu Y. 2022. Testing  
469 Two Somatic Cell Count Cutoff Values for Bovine Subclinical Mastitis Detection Based  
470 on Milk Microbiota and Peripheral Blood Leukocyte Transcriptome Profile. *Animals*  
471 (Basel) 12.
- 472 18. Milani C, Alessandri G, Mangifesta M, Mancabelli L, Lugli GA, Fontana F, Longhi G,  
473 Anzalone R, Viappiani A, Duranti S, Turrone F, Costi R, Annicchiarico A, Morini A, Sarli  
474 L, Ossiprandi MC, van Sinderen D, Ventura M. 2020. Untangling Species-Level  
475 Composition of Complex Bacterial Communities through a Novel Metagenomic  
476 Approach. *mSystems* 5.
- 477 19. Milani C, Lugli GA, Fontana F, Mancabelli L, Alessandri G, Longhi G, Anzalone R,  
478 Viappiani A, Turrone F, van Sinderen D, Ventura M. 2021. METAnnotatorX2: a  
479 Comprehensive Tool for Deep and Shallow Metagenomic Data Set Analyses. *mSystems*  
480 doi:10.1128/mSystems.00583-21:e0058321.
- 481 20. Vandeputte D, Kathagen G, D'Hoe K, Vieira-Silva S, Valles-Colomer M, Sabino J, Wang  
482 J, Tito RY, De Commer L, Darzi Y, Vermeire S, Falony G, Raes J. 2017. Quantitative  
483 microbiome profiling links gut community variation to microbial load. *Nature* 551:507-  
484 511.
- 485 21. Salonen A, Salojarvi J, Lahti L, de Vos WM. 2012. The adult intestinal core microbiota is  
486 determined by analysis depth and health status. *Clin Microbiol Infect* 18 Suppl 4:16-20.
- 487 22. Tap J, Mondot S, Levenez F, Pelletier E, Caron C, Furet JP, Ugarte E, Munoz-Tamayo R,  
488 Paslier DL, Nalin R, Dore J, Leclerc M. 2009. Towards the human intestinal microbiota  
489 phylogenetic core. *Environ Microbiol* 11:2574-84.
- 490 23. Alessandri G, Milani C, Mancabelli L, Mangifesta M, Lugli GA, Viappiani A, Duranti S,  
491 Turrone F, Ossiprandi MC, van Sinderen D, Ventura M. 2019. Metagenomic dissection of  
492 the canine gut microbiota: insights into taxonomic, metabolic and nutritional features.  
493 *Environ Microbiol* 21:1331-1343.
- 494 24. Lugli GA, Duranti S, Milani C, Mancabelli L, Turrone F, Alessandri G, Longhi G,  
495 Anzalone R, Viappiani A, Tarracchini C, Bernasconi S, Yonemitsu C, Bode L, Goran MI,  
496 Ossiprandi MC, van Sinderen D, Ventura M. 2020. Investigating bifidobacteria and human  
497 milk oligosaccharide composition of lactating mothers. *FEMS Microbiol Ecol* 96.
- 498 25. Lugli GA, Duranti S, Albert K, Mancabelli L, Napoli S, Viappiani A, Anzalone R, Longhi  
499 G, Milani C, Turrone F, Alessandri G, Sela DA, van Sinderen D, Ventura M. 2019.  
500 Unveiling Genomic Diversity among Members of the Species *Bifidobacterium*  
501 *pseudolongum*, a Widely Distributed Gut Commensal of the Animal Kingdom. *Appl*  
502 *Environ Microbiol* 85.
- 503 26. Milani C, Duranti S, Napoli S, Alessandri G, Mancabelli L, Anzalone R, Longhi G,  
504 Viappiani A, Mangifesta M, Lugli GA, Bernasconi S, Ossiprandi MC, van Sinderen D,

- 505 Ventura M, Turrone F. 2019. Colonization of the human gut by bovine bacteria present in  
506 Parmesan cheese. *Nat Commun* 10:1286.
- 507 27. Xu S, Liu Y, Gao J, Zhou M, Yang J, He F, Kastelic JP, Deng Z, Han B. 2021. Comparative  
508 Genomic Analysis of *Streptococcus dysgalactiae* subspecies *dysgalactiae* Isolated From  
509 Bovine Mastitis in China. *Front Microbiol* 12:751863.
- 510 28. Bennett S, Ben Said L, Lacasse P, Malouin F, Fliss I. 2021. Susceptibility to Nisin,  
511 Bactofencin, Pediocin and Reuterin of Multidrug Resistant *Staphylococcus aureus*,  
512 *Streptococcus dysgalactiae* and *Streptococcus uberis* Causing Bovine Mastitis. *Antibiotics*  
513 (Basel) 10.
- 514 29. Zhang S, Piepers S, Shan R, Cai L, Mao S, Zou J, Ali T, De Vliegher S, Han B. 2018.  
515 Phenotypic and genotypic characterization of antimicrobial resistance profiles in  
516 *Streptococcus dysgalactiae* isolated from bovine clinical mastitis in 5 provinces of China.  
517 *J Dairy Sci* 101:3344-3355.
- 518 30. Nagahata H, Mukai T, Natsume Y, Okuda M, Ando T, Hisaeda K, Gondaira S, Higuchi H.  
519 2020. Effects of intramammary infusion of *Bifidobacterium breve* on mastitis pathogens  
520 and somatic cell response in quarters from dairy cows with chronic subclinical mastitis.  
521 *Anim Sci J* 91:e13406.
- 522 31. Heikkilä AM, Liski E, Pyörala S, Taponen S. 2018. Pathogen-specific production losses in  
523 bovine mastitis. *J Dairy Sci* 101:9493-9504.
- 524 32. Taponen S, Liski E, Heikkilä AM, Pyörala S. 2017. Factors associated with intramammary  
525 infection in dairy cows caused by coagulase-negative staphylococci, *Staphylococcus*  
526 *aureus*, *Streptococcus uberis*, *Streptococcus dysgalactiae*, *Corynebacterium bovis*, or  
527 *Escherichia coli*. *J Dairy Sci* 100:493-503.
- 528 33. Alessandri G, Ossiprandi MC, MacSharry J, van Sinderen D, Ventura M. 2019.  
529 Bifidobacterial Dialogue With Its Human Host and Consequent Modulation of the Immune  
530 System. *Front Immunol* 10:2348.
- 531 34. Turrone F, Milani C, Duranti S, Mahony J, van Sinderen D, Ventura M. 2018. Glycan  
532 Utilization and Cross-Feeding Activities by Bifidobacteria. *Trends Microbiol* 26:339-350.
- 533 35. Falentin H, Rault L, Nicolas A, Bouchard DS, Lassalas J, Lambert P, Aubry JM, Marnet  
534 PG, Le Loir Y, Even S. 2016. Bovine Teat Microbiome Analysis Revealed Reduced Alpha  
535 Diversity and Significant Changes in Taxonomic Profiles in Quarters with a History of  
536 Mastitis. *Front Microbiol* 7:480.
- 537 36. Catozzi C, Sanchez Bonastre A, Francino O, Lecchi C, De Carlo E, Vecchio D,  
538 Martucciello A, Fraulo P, Bronzo V, Cusco A, D'Andreano S, Cecilian F. 2017. The  
539 microbiota of water buffalo milk during mastitis. *PLoS One* 12:e0184710.
- 540 37. Doll EV, Staib L, Huptas C, Scherer S, Wenning M. 2021. *Facklamia lactis* sp. nov.,  
541 isolated from raw milk. *Int J Syst Evol Microbiol* 71.
- 542 38. Wang Y, Nan X, Zhao Y, Wang H, Wang M, Jiang L, Zhang F, Xue F, Hua D, Li K, Liu  
543 J, Yao J, Xiong B. 2020. Coupling 16S rDNA Sequencing and Untargeted Mass  
544 Spectrometry for Milk Microbial Composition and Metabolites from Dairy Cows with  
545 Clinical and Subclinical Mastitis. *J Agric Food Chem* 68:8496-8508.
- 546 39. Gomes F, Henriques M. 2016. Control of Bovine Mastitis: Old and Recent Therapeutic  
547 Approaches. *Curr Microbiol* 72:377-82.
- 548 40. Varhimo E, Varmanen P, Fallarero A, Skogman M, Pyörala S, Iivanainen A, Sukura A,  
549 Vuorela P, Savijoki K. 2011. Alpha- and beta-casein components of host milk induce



- 550 biofilm formation in the mastitis bacterium *Streptococcus uberis*. *Vet Microbiol* 149:381-  
551 9.
- 552 41. Cheng WN, Han SG. 2020. Bovine mastitis: risk factors, therapeutic strategies, and  
553 alternative treatments - A review. *Asian-Australas J Anim Sci* 33:1699-1713.
- 554 42. Kurban D, Roy JP, Kabera F, Frechette A, Um MM, Albaaj A, Rowe S, Godden S, Adkins  
555 PRF, Middleton JR, Gauthier ML, Keefe GP, DeVries TJ, Kelton DF, Moroni P, Veiga  
556 Dos Santos M, Barkema HW, Dufour S. 2022. Diagnosing Intramammary Infection: Meta-  
557 Analysis and Mapping Review on Frequency and Udder Health Relevance of  
558 Microorganism Species Isolated from Bovine Milk Samples. *Animals (Basel)* 12.
- 559 43. Lucken A, Woudstra S, Wente N, Zhang Y, Kromker V. 2022. Intramammary infections  
560 with *Corynebacterium* spp. in bovine lactating udder quarters. *PLoS One* 17:e0270867.
- 561 44. Goncalves JL, Tomazi T, Barreiro JR, Beuron DC, Arcari MA, Lee SH, Martins CM,  
562 Araujo Junior JP, dos Santos MV. 2016. Effects of bovine subclinical mastitis caused by  
563 *Corynebacterium* spp. on somatic cell count, milk yield and composition by comparing  
564 contralateral quarters. *Vet J* 209:87-92.
- 565 45. Goncalves JL, Tomazi T, Barreiro JR, Braga PA, Ferreira CR, Araujo Junior JP, Eberlin  
566 MN, dos Santos MV. 2014. Identification of *Corynebacterium* spp. isolated from bovine  
567 intramammary infections by matrix-assisted laser desorption ionization-time of flight mass  
568 spectrometry. *Vet Microbiol* 173:147-51.
- 569 46. Antanaitis R, Juozaitiene V, Jonike V, Baumgartner W, Paulauskas A. 2021. Milk Lactose  
570 as a Biomarker of Subclinical Mastitis in Dairy Cows. *Animals (Basel)* 11.
- 571 47. Bari MS, Rahman MM, Persson Y, Derks M, Sayeed MA, Hossain D, Singha S, Hoque  
572 MA, Sivaraman S, Fernando P, Ahmad I, Samad A, Koop G. 2022. Subclinical mastitis in  
573 dairy cows in south-Asian countries: a review of risk factors and etiology to prioritize  
574 control measures. *Vet Res Commun* 46:621-640.
- 575 48. Fernandez L, Arroyo R, Espinosa I, Marin M, Jimenez E, Rodriguez JM. 2014. Probiotics  
576 for human lactational mastitis. *Benef Microbes* 5:169-83.
- 577 49. Hoque MN, Istiaq A, Clement RA, Sultana M, Crandall KA, Siddiki AZ, Hossain MA.  
578 2019. Metagenomic deep sequencing reveals association of microbiome signature with  
579 functional biases in bovine mastitis. *Sci Rep* 9:13536.

580

a)

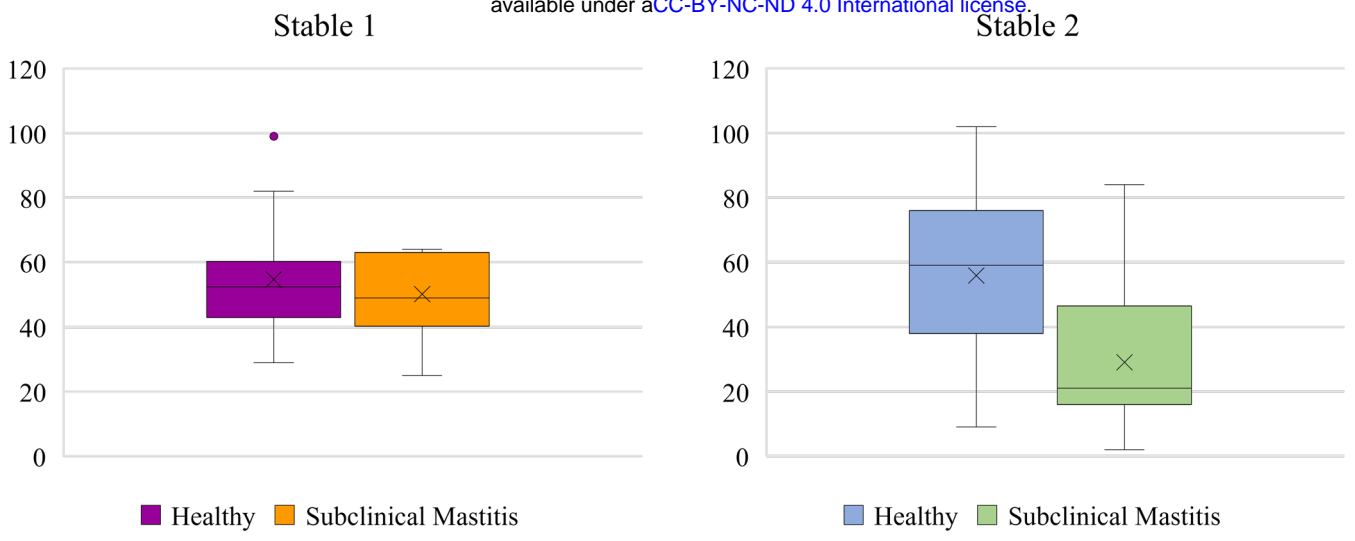

b)

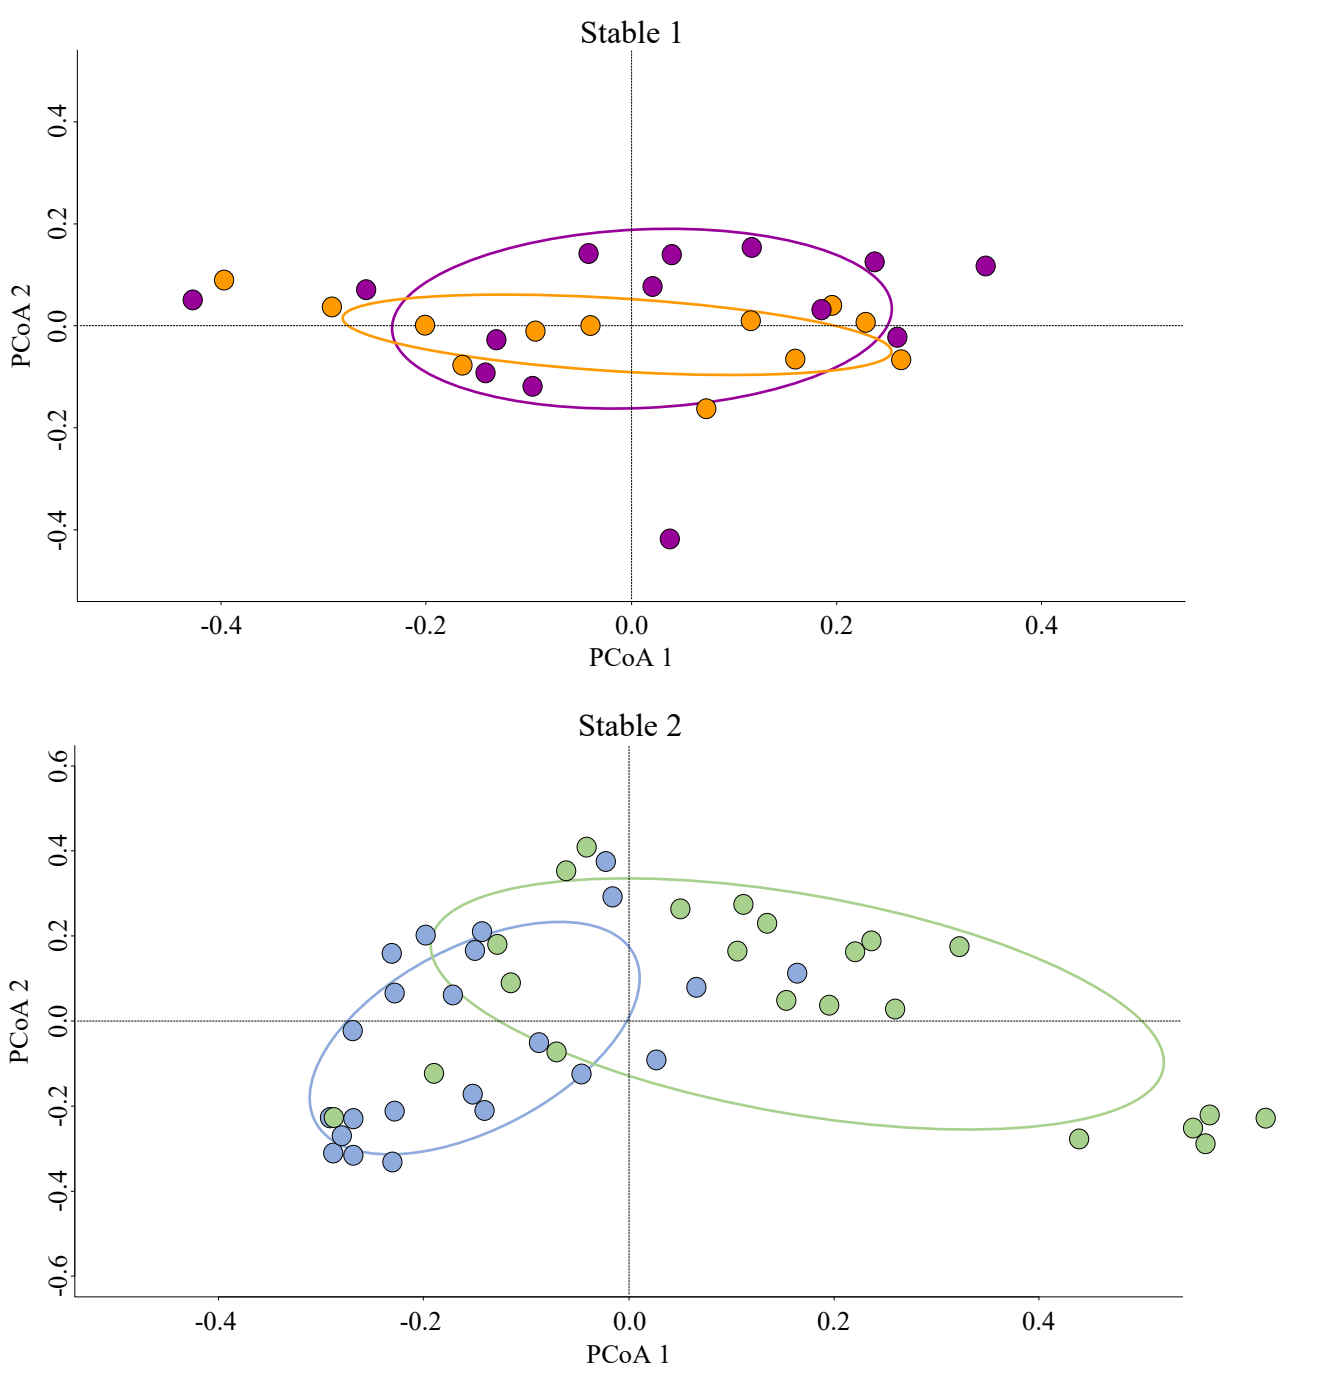

Figure 1

a)

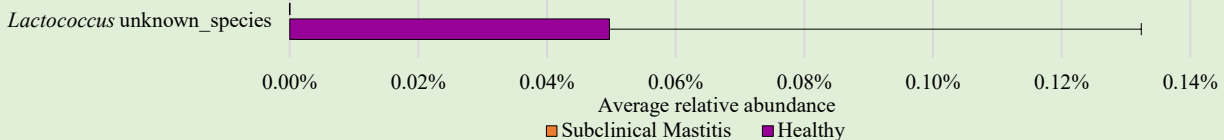

b)

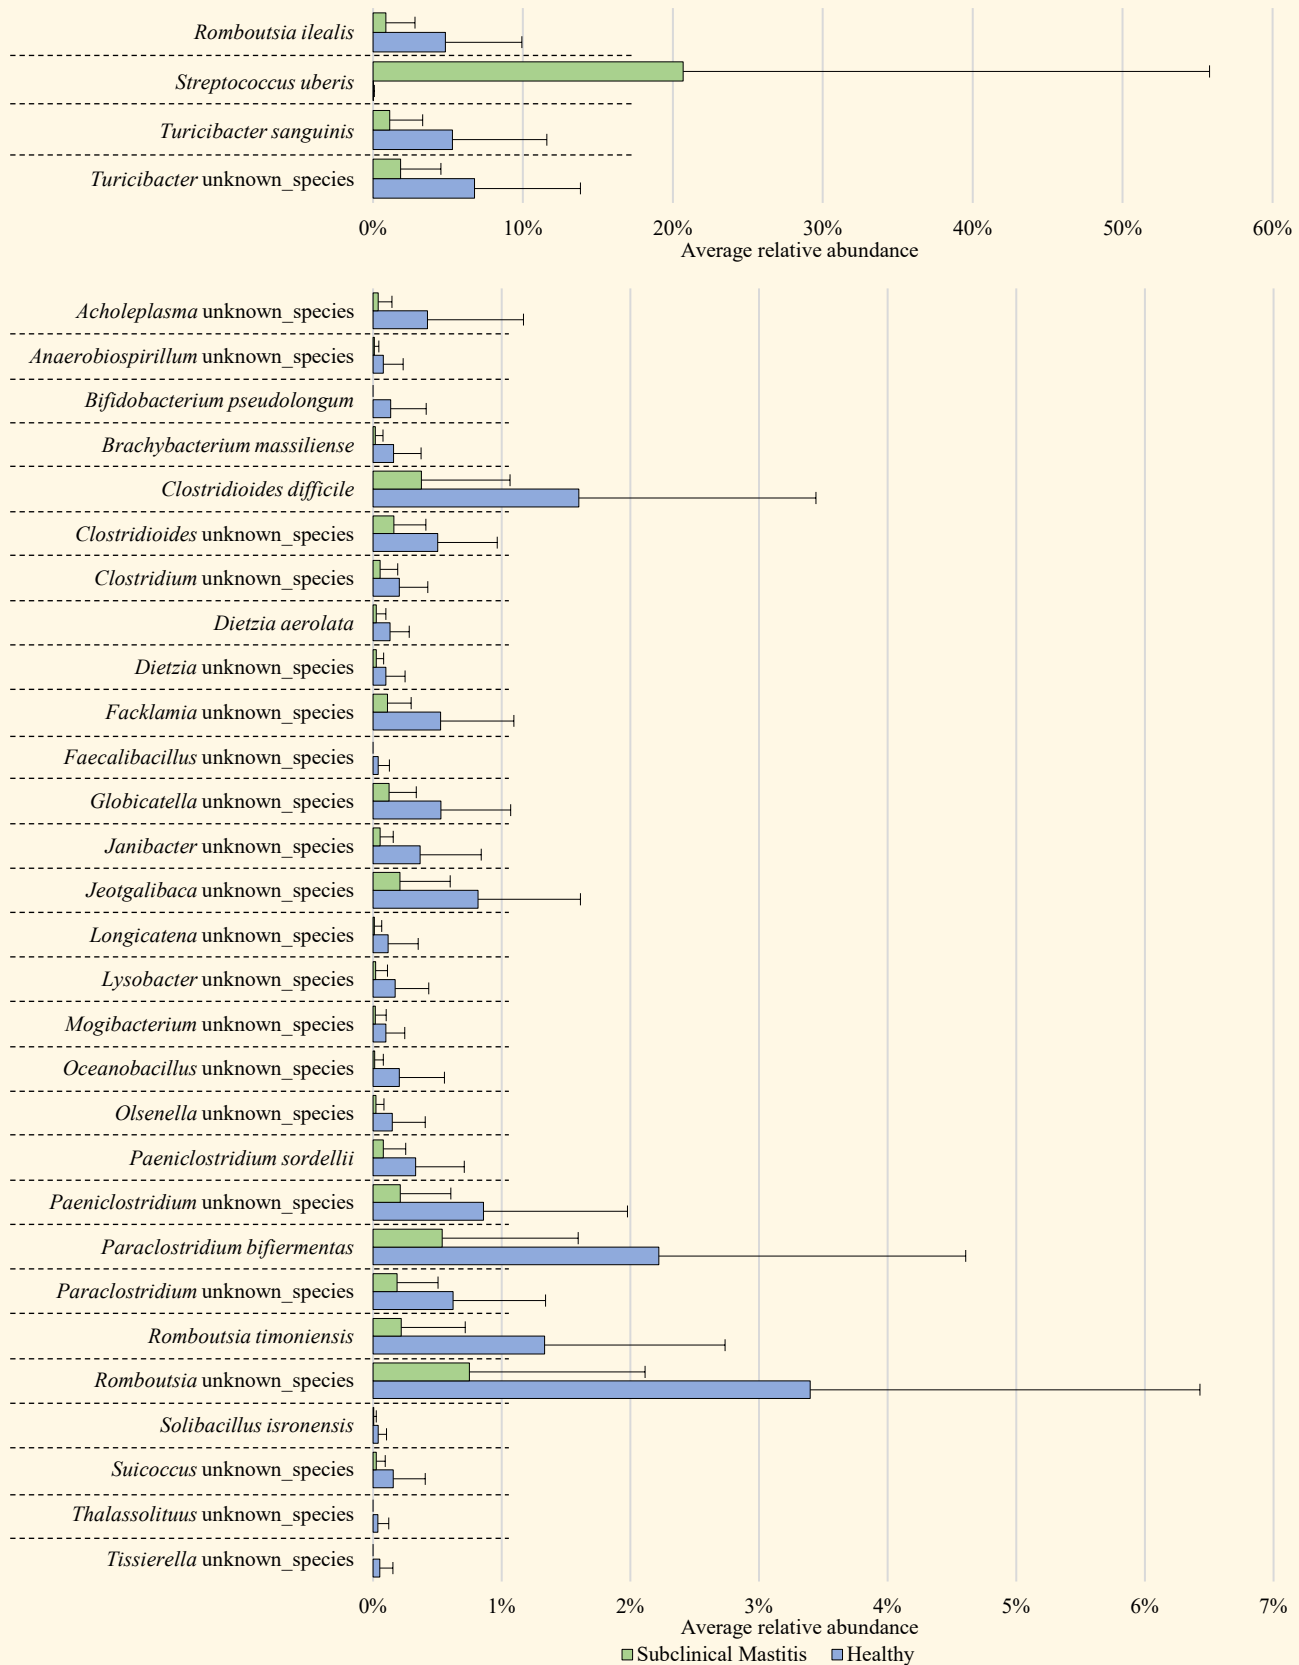

Figure 2

a)

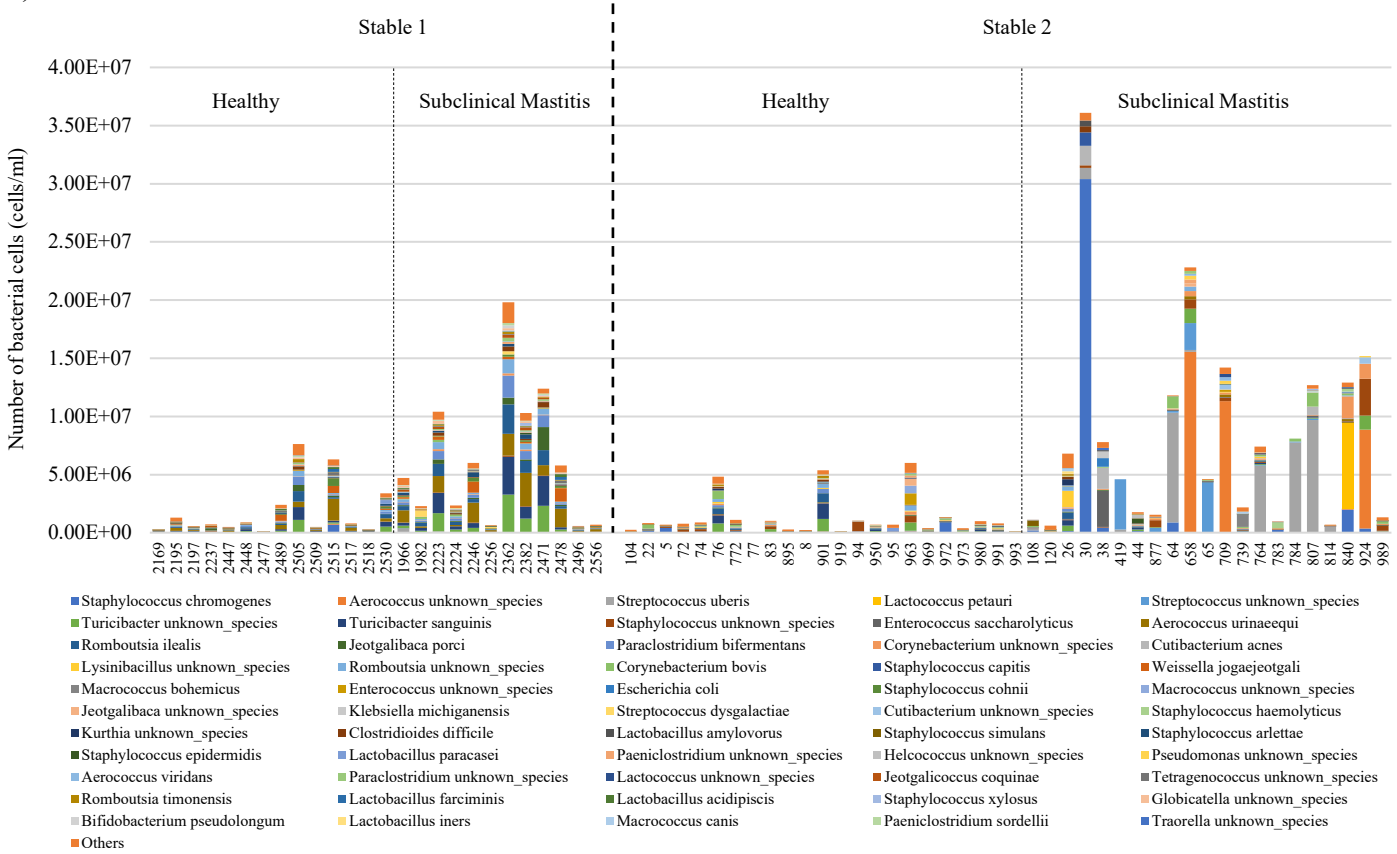

b)

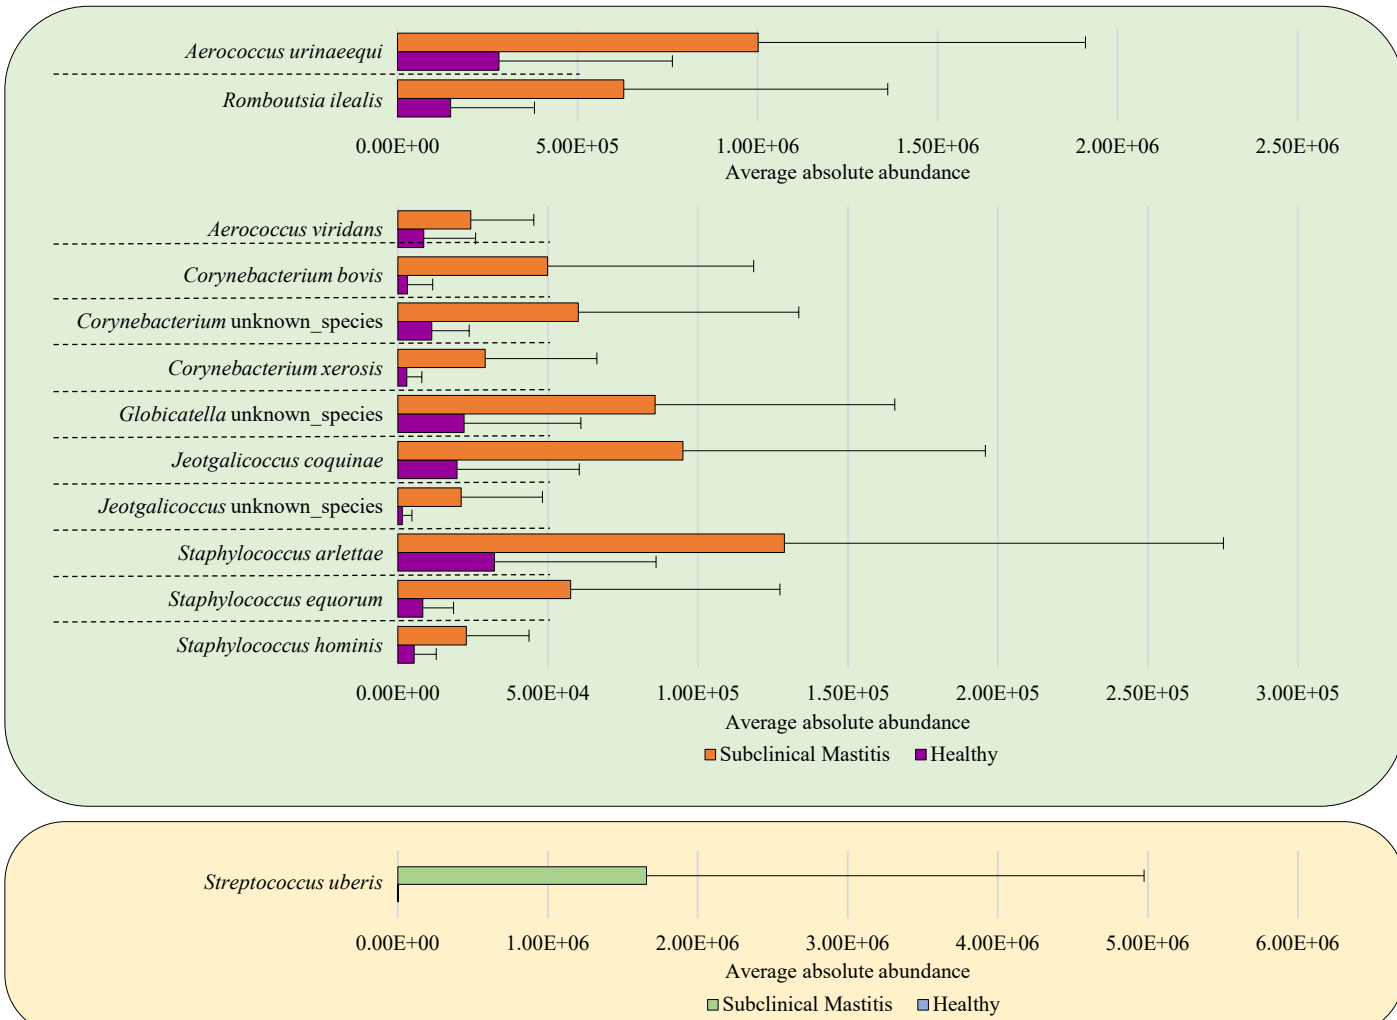

Figure 3

a)

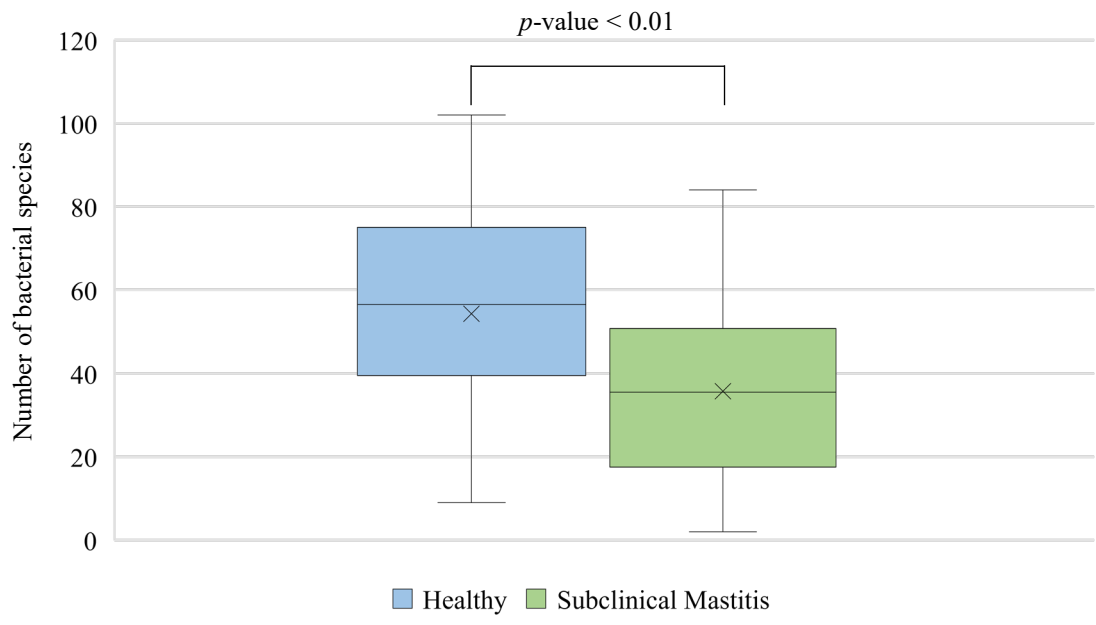

b)

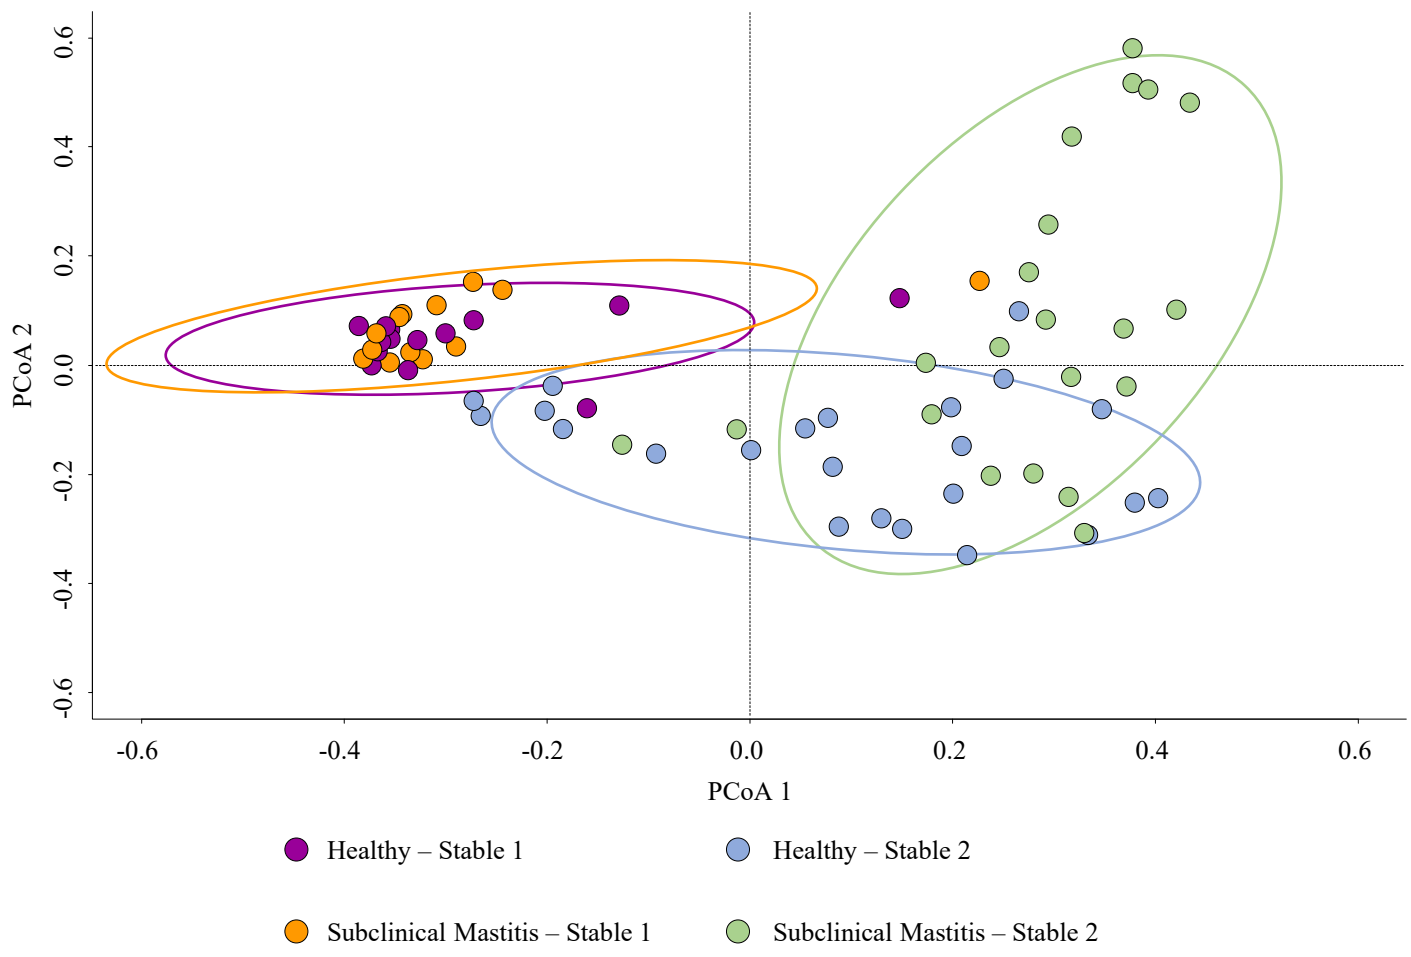

Figure S1
